# Supplementary material for: Retrospective interrupted time series examining hypertension and diabetes medicines usage following changes in patient cost sharing in the ‘Farmácia Popular’ programme in Brazil
Source: PubMed Central journal article supplement — BMJ Open. 2017 Nov 3;7(11):e017308. doi: 10.1136/bmjopen-2017-017308 (PMC5695305; doi:10.1136/bmjopen-2017-017308), 2017-11-03
Supplement: bmjopen-2017-017308supp001.pdf [file bmjopen-2017-017308supp001.pdf]

Appendix 1. Medicines average unit price in local currency (reais), and average price treatment for 30 days' supply for glibenclamide 5mg, metformin 850mg, metformin 500mg, metformin slow release, losartan 50 mg, atenolol 25mg, propranolol 40 mg , hydrochlorothiazide 25mg, captopril 25mg, enalapril 5mg by stage of the Farmácia Popular program, Brazil, 2008 to 2012.

|                          | Baseline Average Price<br>(Jan 2008 to March 2009) |         |       | AFP II Average Price<br>(April 2009 to Jan 2011) |         |       |                    |                    | SNP Average Price<br>(Feb 2011 to Dec 2012) |       |                    |                    |
|--------------------------|----------------------------------------------------|---------|-------|--------------------------------------------------|---------|-------|--------------------|--------------------|---------------------------------------------|-------|--------------------|--------------------|
|                          | Total                                              | Patient | MoH   | Total                                            | Patient | MoH   | Absolute<br>change | Relative<br>Change | Total                                       | MoH   | Absolute<br>change | Relative<br>Change |
| <b>UNIT PRICE</b>        |                                                    |         |       |                                                  |         |       |                    |                    |                                             |       |                    |                    |
| Hypoglycemic             |                                                    |         |       |                                                  |         |       |                    |                    |                                             |       |                    |                    |
| Glibenclamide 5mg        | 0.24                                               | 0.04    | 0.20  | 0.21                                             | 0.06    | 0.15  | 0.02               | 39.0               | 0.13                                        | 0.13  | -0.02              | -100               |
| Metformin 850mg          | 0.37                                               | 0.07    | 0.30  | 0.33                                             | 0.10    | 0.23  | 0.04               | 53.9               | 0.17                                        | 0.17  | -0.04              | -100               |
| Metformin 500mg          | 0.26                                               | 0.06    | 0.20  | 0.25                                             | 0.08    | 0.17  | 0.01               | 24.1               | 0.14                                        | 0.14  | -0.01              | -100               |
| Metformin slow release   | 0.45                                               | 0.25    | 0.19  | 0.45                                             | 0.29    | 0.15  | 0.04               | 16.8               | 0.19                                        | 0.19  | -0.04              | -100               |
| Antihypertensive         |                                                    |         |       |                                                  |         |       |                    |                    |                                             |       |                    |                    |
| Losartan 50 mg           | -                                                  | -       | -     | 0.75                                             | 0.34    | 0.41  | 0.34               | NA                 | 0.34                                        | 0.34  | -0.34              | -100               |
| Atenolol 25mg            | 0.32                                               | 0.05    | 0.27  | 0.30                                             | 0.08    | 0.22  | 0.03               | 54.4               | 0.20                                        | 0.20  | -0.03              | -100               |
| Propranolol 40 mg        | 0.17                                               | 0.04    | 0.13  | 0.15                                             | 0.05    | 0.10  | 0.01               | 32.76              | 0.09                                        | 0.08  | -0.01              | -100               |
| Hydrochlorothiazide 25mg | 0.19                                               | 0.03    | 0.16  | 0.15                                             | 0.05    | 0.10  | 0.02               | 80.12              | 0.08                                        | 0.08  | -0.02              | -100               |
| Captopril 25mg           | 0.53                                               | 0.09    | 0.44  | 0.43                                             | 0.11    | 0.33  | 0.02               | 23.17              | 0.30                                        | 0.29  | -0.02              | -100               |
| Enalapril 5mg            | 0.71                                               | 0.11    | 0.60  | 0.59                                             | 0.14    | 0.46  | 0.03               | 26.18              | 0.41                                        | 0.41  | -0.03              | -100               |
| <b>TREATMENT PRICE</b>   |                                                    |         |       |                                                  |         |       |                    |                    |                                             |       |                    |                    |
| Hypoglycemic             |                                                    |         |       |                                                  |         |       |                    |                    |                                             |       |                    |                    |
| Glibenclamide 5mg        | 7.27                                               | 1.33    | 5.94  | 6.38                                             | 1.86    | 4.53  | 0.52               | 39.0               | 3.83                                        | 3.81  | -0.52              | -100               |
| Metformin 850mg          | 10.99                                              | 2.00    | 8.99  | 9.83                                             | 3.07    | 6.75  | 1.08               | 53.9               | 5.12                                        | 5.09  | -1.08              | -100               |
| Metformin 500mg          | 7.67                                               | 1.82    | 5.85  | 7.44                                             | 2.26    | 5.18  | 0.44               | 24.1               | 4.16                                        | 4.13  | -0.44              | -100               |
| Metformin slow release   | 13.39                                              | 7.57    | 5.83  | 13.63                                            | 8.84    | 4.53  | 1.27               | 16.8               | 5.71                                        | 5.56  | -1.27              | -100               |
| Antihypertensive         |                                                    |         |       |                                                  |         |       |                    |                    |                                             |       |                    |                    |
| Losartan 50 mg           | -                                                  | -       | -     | 22.39                                            | 10.22   | 12.17 | 10.22              | NA                 | 10.27                                       | 10.19 | 10.22              | NA                 |
| Atenolol 25mg            | 9.60                                               | 1.46    | 8.14  | 8.98                                             | 2.25    | 6.73  | 0.79               | 54.4               | 6.04                                        | 6.01  | -0.79              | -100               |
| Propranolol 40 mg        | 4.97                                               | 1.13    | 3.83  | 4.44                                             | 1.50    | 2.93  | 0.37               | 32.7               | 2.56                                        | 2.54  | -0.37              | -100               |
| Hydrochlorothiazide 25mg | 5.67                                               | 0.82    | 4.85  | 4.46                                             | 1.47    | 2.98  | 0.66               | 80.1               | 2.55                                        | 2.53  | -0.66              | -100               |
| Captopril 25mg           | 15.78                                              | 2.61    | 13.17 | 13.04                                            | 3.22    | 9.82  | 0.61               | 23.1               | 8.86                                        | 8.82  | -0.61              | -100               |
| Enalapril 5mg            | 21.15                                              | 3.29    | 17.87 | 17.83                                            | 4.15    | 13.68 | 0.86               | 26.1               | 12.34                                       | 12.29 | -0.86              | -100               |
