# Supplementary material for: Retrospective interrupted time series examining hypertension and diabetes medicines usage following changes in patient cost sharing in the ‘Farmácia Popular’ programme in Brazil
Source: PubMed Central journal article supplement — BMJ Open. 2017 Nov 3;7(11):e017308. doi: 10.1136/bmjopen-2017-017308 (PMC5695305; doi:10.1136/bmjopen-2017-017308), 2017-11-03

Appendix 2. Number of dispensings and unadjusted 25th/Median/75th percentiles of Proportion of Days Covered, glibenclamide 5mg, metformin 850mg, metformin 500mg and metformin slow release, by stage of the Farmácia Popular program, Brazil, 2008 to 2012.

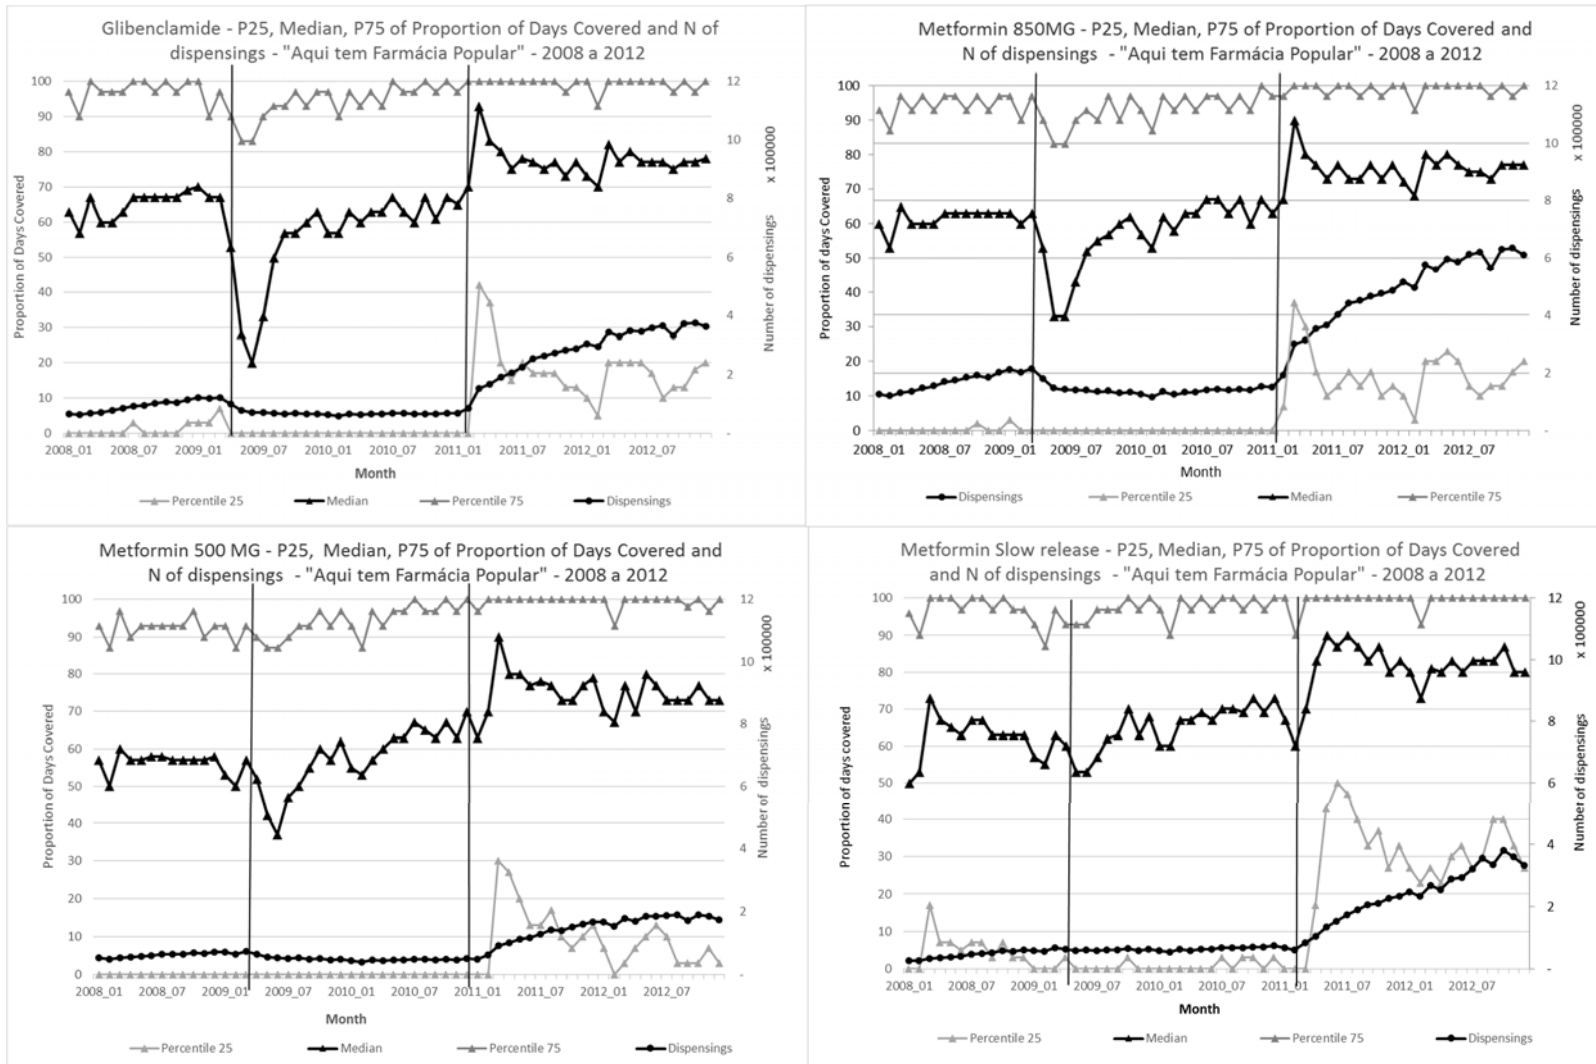

Supplement: bmjopen-2017-017308supp002.pdf [file bmjopen-2017-017308supp002.pdf]
