# Supplementary material for: Retrospective interrupted time series examining hypertension and diabetes medicines usage following changes in patient cost sharing in the ‘Farmácia Popular’ programme in Brazil
Source: PubMed Central journal article supplement — BMJ Open. 2017 Nov 3;7(11):e017308. doi: 10.1136/bmjopen-2017-017308 (PMC5695305; doi:10.1136/bmjopen-2017-017308), 2017-11-03

Appendix 3. Number of dispensings and unadjusted 25th/Median/75th percentiles of Proportion of Days Covered, atenolol 25mg, propranolol 40 mg, hydrochlorothiazide 25mg, captopril 25mg, enalapril 5mg and losartan 50 mg by stage of the Farmácia Popular program, Brazil, 2008 to 2012.

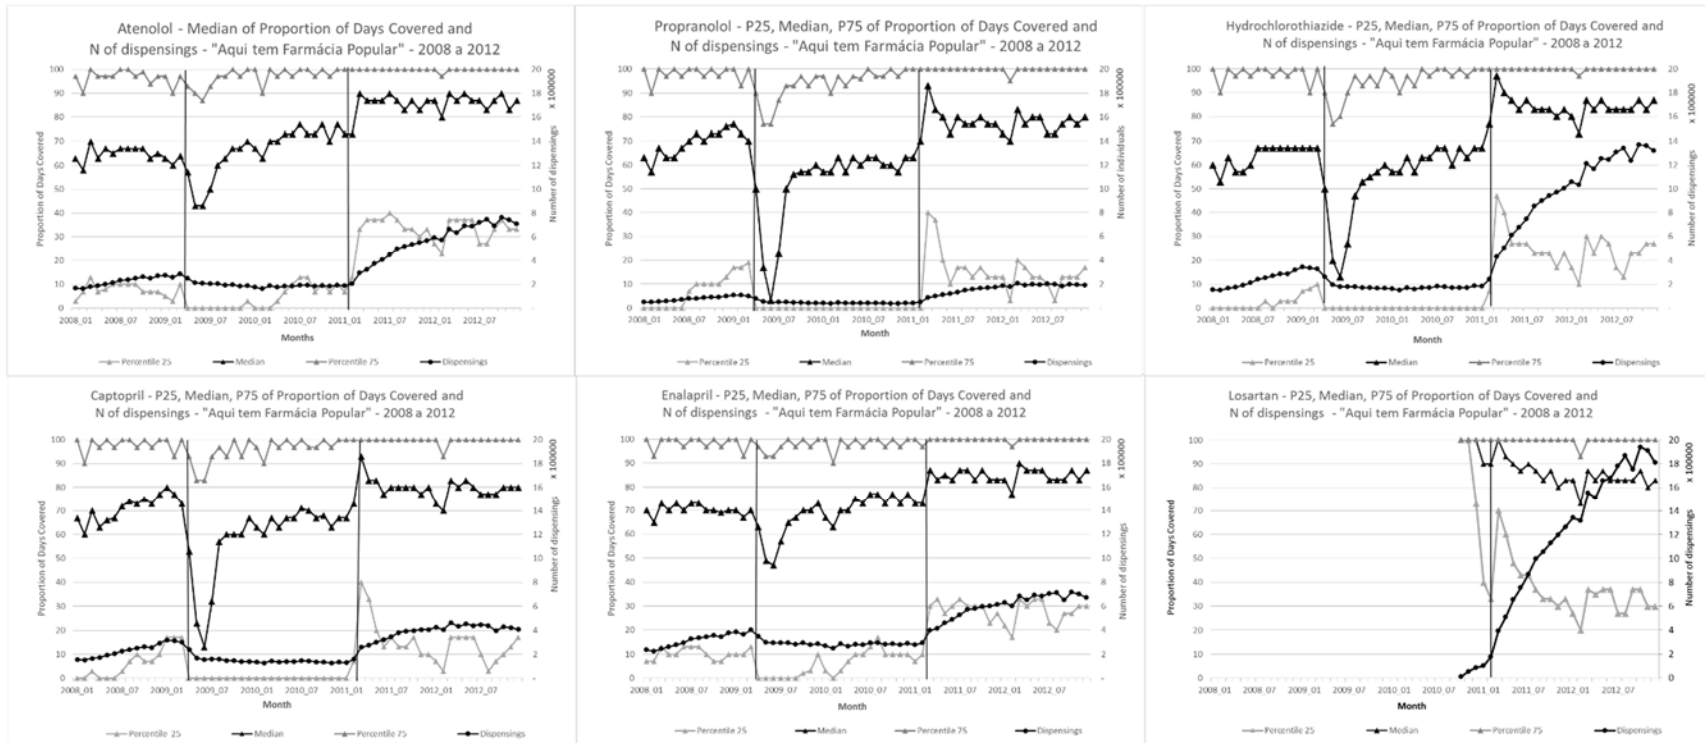

Supplement: bmjopen-2017-017308supp003.pdf [file bmjopen-2017-017308supp003.pdf]
